# Supplementary material for: Modifying SnO2 with ammonium polyacrylate to enhance the performance of perovskite solar cells
Source: Royal Society of Chemistry journal article supplement (doi:10.1039/d2nj06313a), 2023-01-01
Supplement: d2nj06313a1.pdf [file d2nj06313a1.pdf]

## Supporting information

# Modifying SnO<sub>2</sub> with Ammonium Polyacrylate to Enhance the Performance of Perovskite Solar Cells

Yu Wu,<sup>a</sup> Yanqing Wang, <sup>\*a</sup> Mengzhu Li,<sup>a</sup> Zhaozhao Wang,<sup>a</sup> Wenfei Wu,<sup>a</sup> Huifang Song,<sup>a</sup> Qingsha Liu <sup>a</sup> and Chengwu Shi <sup>a</sup>

<sup>a</sup> School of Chemistry and Chemical Engineering, Hefei University of Technology, Hefei 230009, P. R. China.

Email address: yqwang@hfut.edu.cn (Yanqing Wang)

### Measurements

Atom force microscope (AFM) and the top view of scanning electron microscope (SEM) were used to obtain the surface morphology of perovskite layer. The phases of ITO glass and CsMAFA perovskite layers were recorded by X-ray diffraction (Nalytical, Netherlands). Surface element and valence states of SnO<sub>2</sub> and modified SnO<sub>2</sub> were analysed by X-ray photoelectron spectroscopy (Thermo Fisher Scientific, USA). The energy band structure of SnO<sub>2</sub> and modified SnO<sub>2</sub> was analysed by ultraviolet photoelectron spectroscopy (Thermo Fisher Scientific, USA). Transmittances of different kind of ETL were recorded by UV–vis-NIR spectrophotometer (Perkinelmer, USA). Absorption spectra of ITO/ SnO<sub>2</sub>/perovskite were recorded by UV–vis-NIR spectrophotometer (Perkinelmer, USA). The photovoltaic performance of PSCs was recorded by photocurrent density–voltage (*J*-*V*) curves using a Keithley 2450 source meter (Tektronix, USA). The incident light from a solar simulator (Beijing Perfectlight Technology, China) was calibrated to one-sun illumination (AM 1.5G, 100 mW cm<sup>-2</sup>) by a standard single-crystal silicon solar cell. Electrochemical impedance spectroscopy (EIS) of PSCs were recorded by an IM6 electrochemical workstation (Shanghai Chenhua Device Company, China). The symmetrical devices of ITO/SnO<sub>2</sub>/perovskite/spiro-OMeTAD/Au were fabricated and characterized by a Keithley 2450 source meter (Tektronix, USA) for the space-charge-limited current (SCLC) analysis. The symmetrical devices of ITO/SnO<sub>2</sub>/perovskite/spiro-OMeTAD/Au were fabricated and characterized by monochromatic incident photon-to-electron conversion efficiency (Beijing China Education Au-light, China).

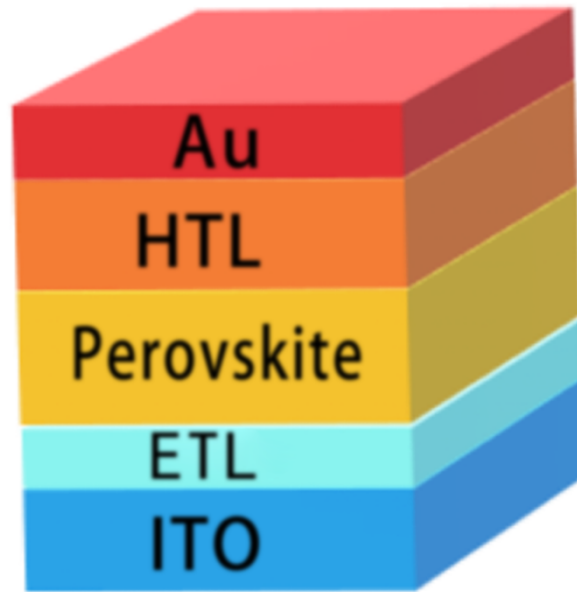

**Fig. S1.** Schematic device architecture of PSCs studied.

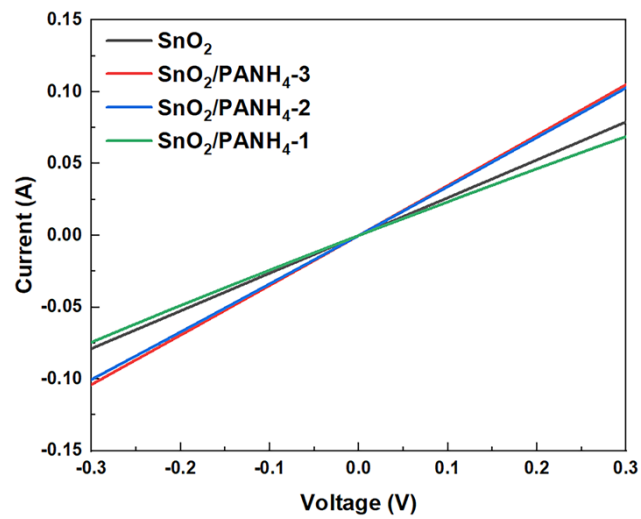

**Fig. S2.** Dark  $I-V$  measurement of SnO<sub>2</sub>, SnO<sub>2</sub>/PANH<sub>4</sub>-1, SnO<sub>2</sub>/PANH<sub>4</sub>-2 and SnO<sub>2</sub>/PANH<sub>4</sub>-3.

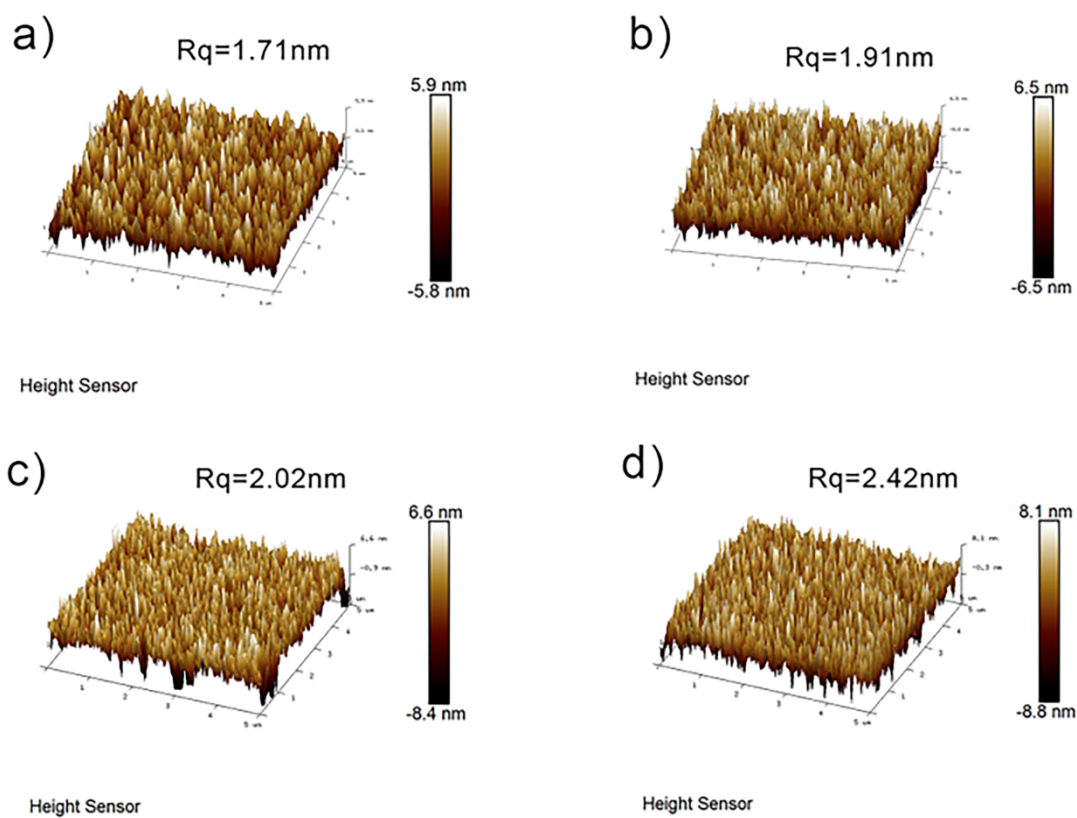

**Fig. S3.** AFM images of different substrates: (a)  $\text{SnO}_2$ , (b)  $\text{SnO}_2/\text{PANH}_4\text{-3}$ , (c)  $\text{SnO}_2/\text{PANH}_4\text{-2}$ , (d)  $\text{SnO}_2/\text{PANH}_4\text{-1}$ .

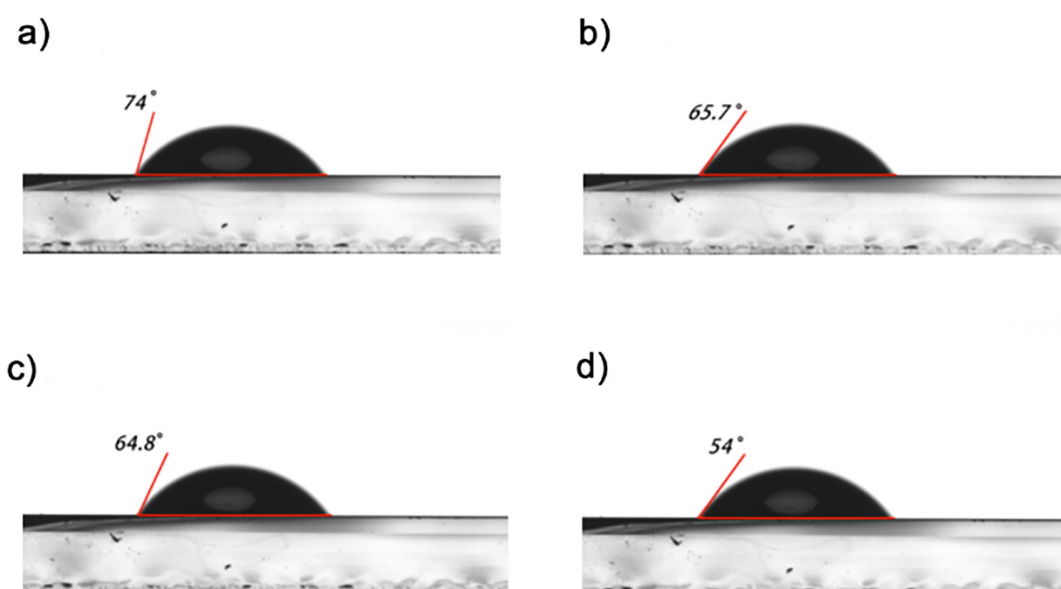

**Fig. S4.** Contact angle of water droplets on different substrates: (a)  $\text{SnO}_2$ , (b)  $\text{SnO}_2/\text{PANH}_4\text{-3}$ , (c)  $\text{SnO}_2/\text{PANH}_4\text{-2}$ , (d)  $\text{SnO}_2/\text{PANH}_4\text{-1}$ .

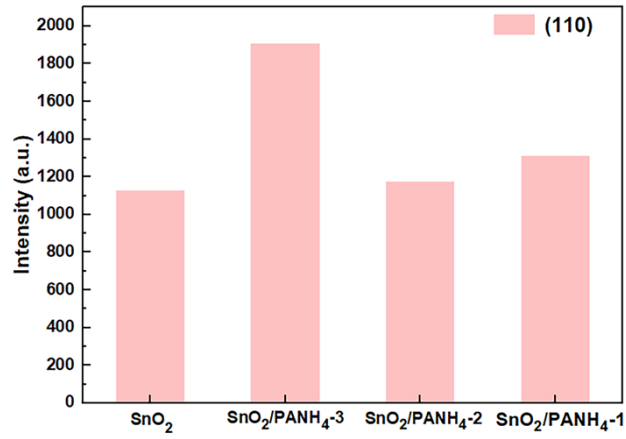

**Fig. S5.** (110) peak strength of perovskite. (SnO<sub>2</sub>, SnO<sub>2</sub>/PANH<sub>4</sub>-1, SnO<sub>2</sub>/PANH<sub>4</sub>-2 and SnO<sub>2</sub>/PANH<sub>4</sub>-3)

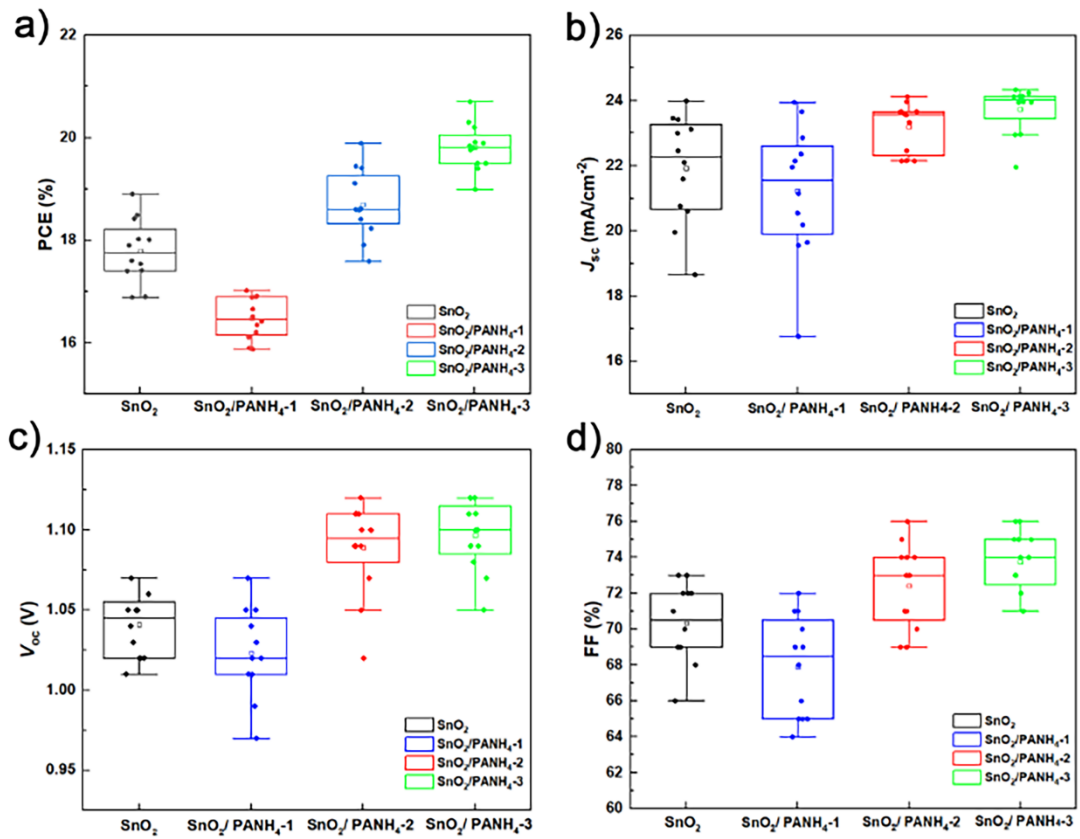

**Fig. S6.** Statistic output parameters of PSCs deposited on SnO<sub>2</sub>, SnO<sub>2</sub>/PANH<sub>4</sub>-1, SnO<sub>2</sub>/PANH<sub>4</sub>-2 and SnO<sub>2</sub>/PANH<sub>4</sub>-3 : (a) PCE, (b) J<sub>sc</sub>, (c) V<sub>oc</sub> and (d) FF.

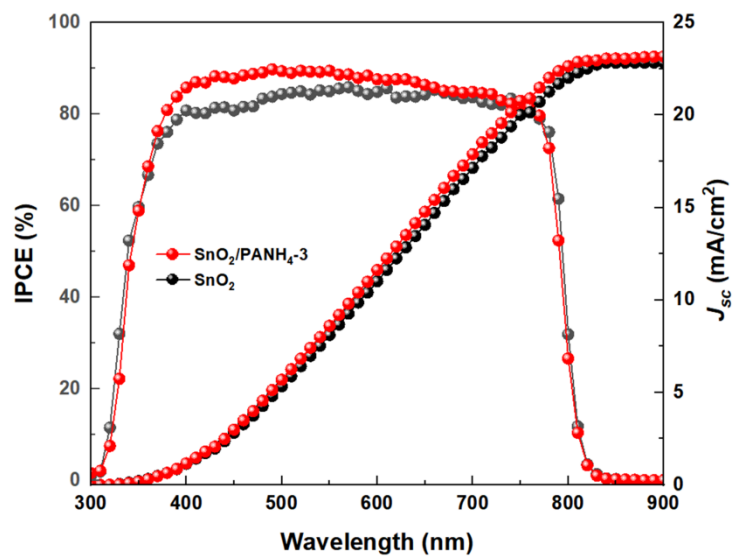

Fig. S7. IPCE spectra of device based on SnO<sub>2</sub> and SnO<sub>2</sub>/PANH<sub>4</sub>-3.

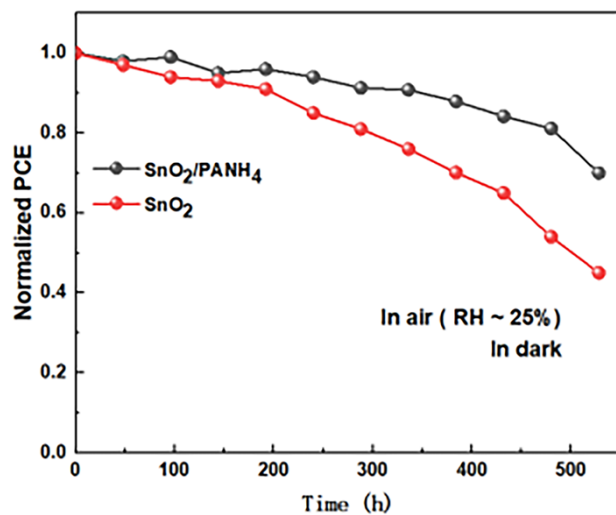

Fig. S8. Changing of PCEs for the devices made using SnO<sub>2</sub> and SnO<sub>2</sub>/PANH<sub>4</sub>.
